# Supplementary material
Source: MDPI journal article supplement (https://www.mdpi.com/2072-4292/13/3/436)
Supplement: s1 [file s1]

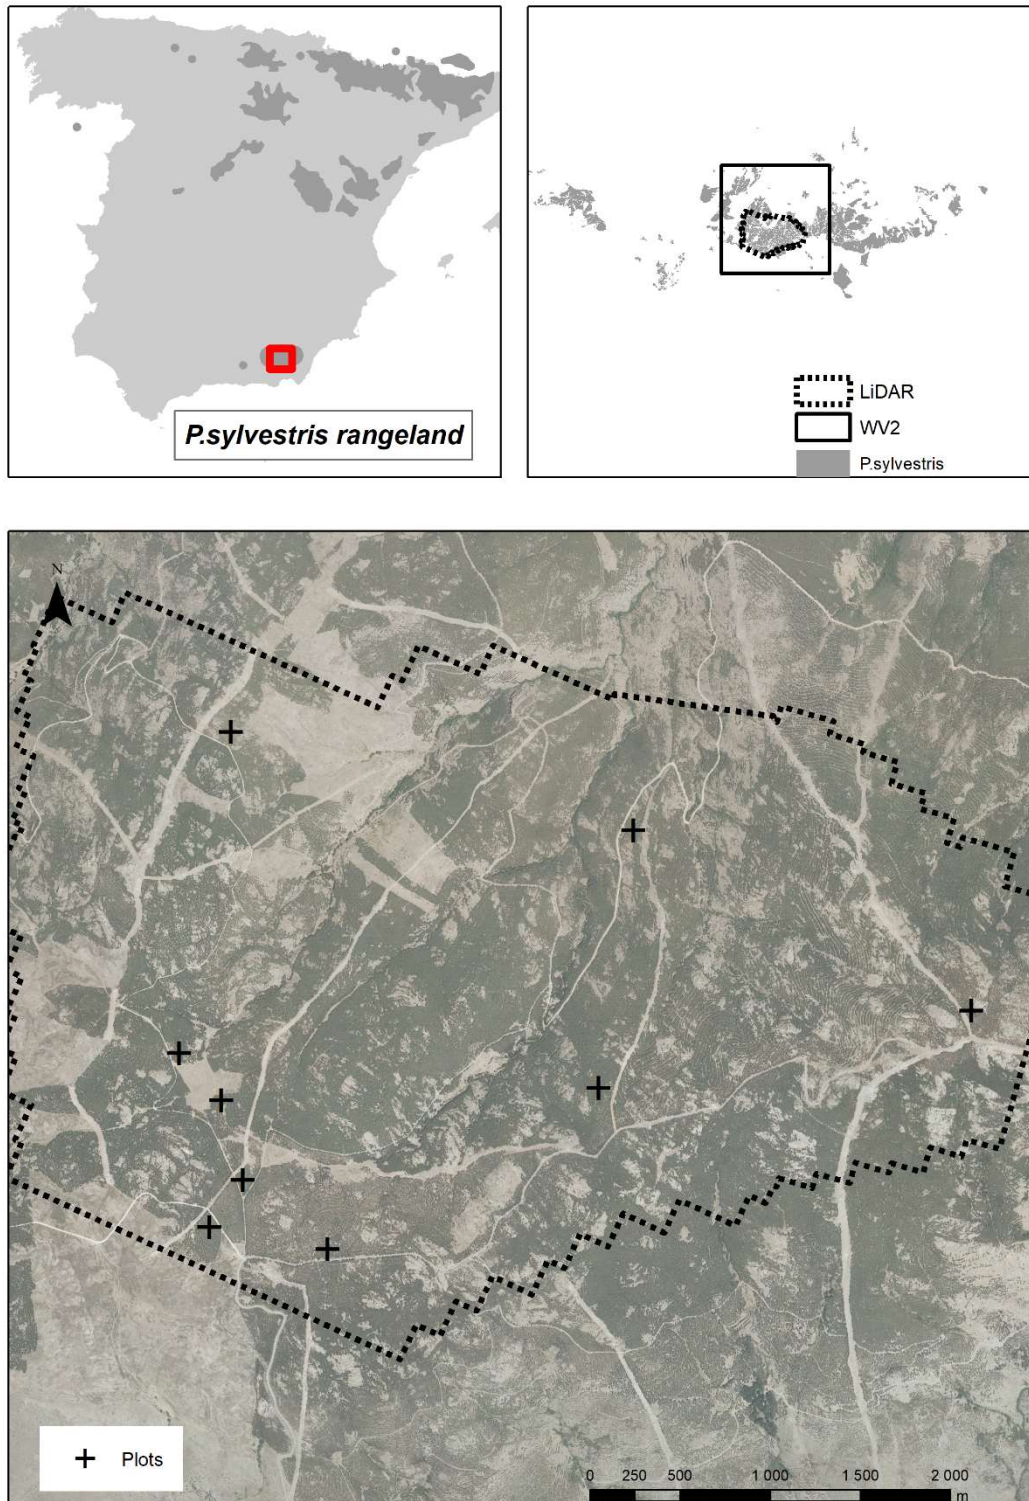

**Figure S1.** Map of the study area in Sierra de los Filabres (Almería), showing the World View-2 scene, the LiDAR dataset and the tree sampled field data

| Class 0: non-damage                                                                | Class 1: slight damage                                                              |
|------------------------------------------------------------------------------------|-------------------------------------------------------------------------------------|
|   |   |
| Class 2: medium damage                                                             | Class 3: high damage                                                                |
|  |  |

**Figure S2.** Examples of severity classes of individual trees as a function of defoliation percentage and pigment concentration (total Chlorophyll). Severity classes 0: non-damage 1: slight, 2: medium, and 3: High. Adapted from Lakatos et al. [57, see Table 3].

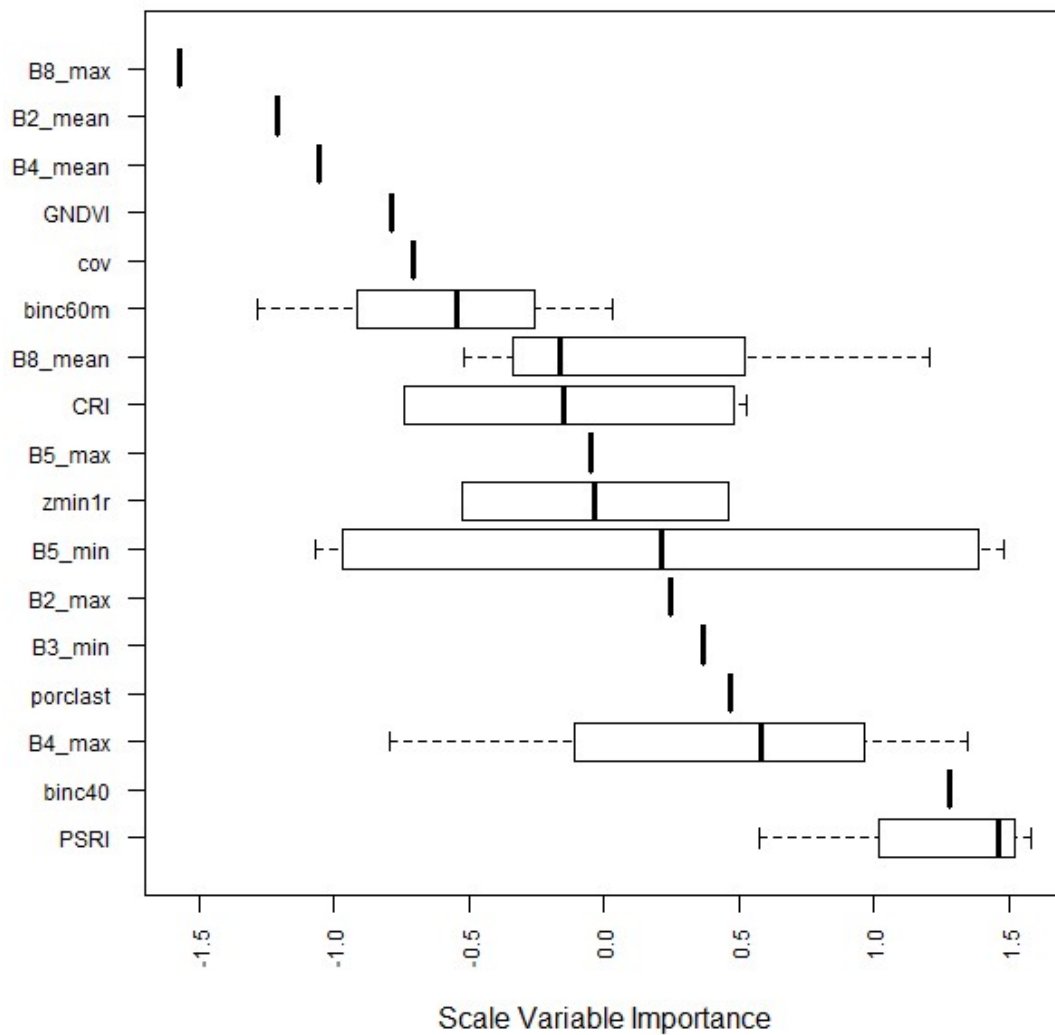

**Figure S3.** Scale variable importance of the variables used in selected models



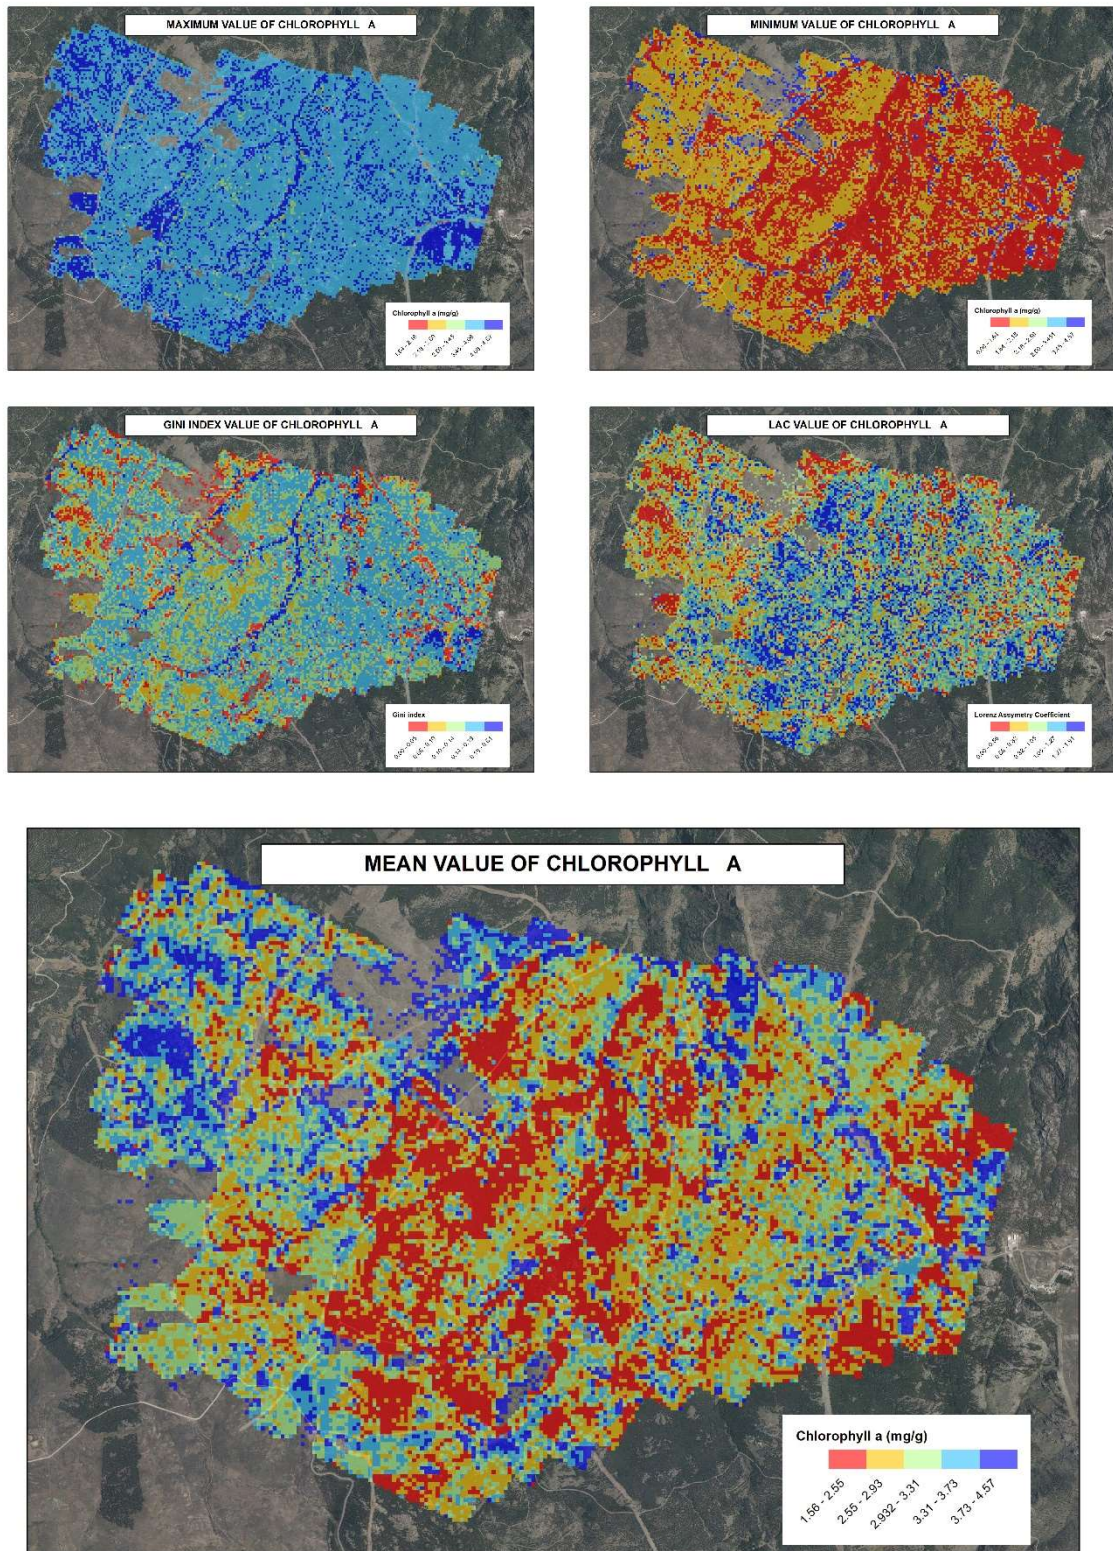

**Figure S4:** Summarizing raster layers for Chlorophyll a concentration in every individual tree.



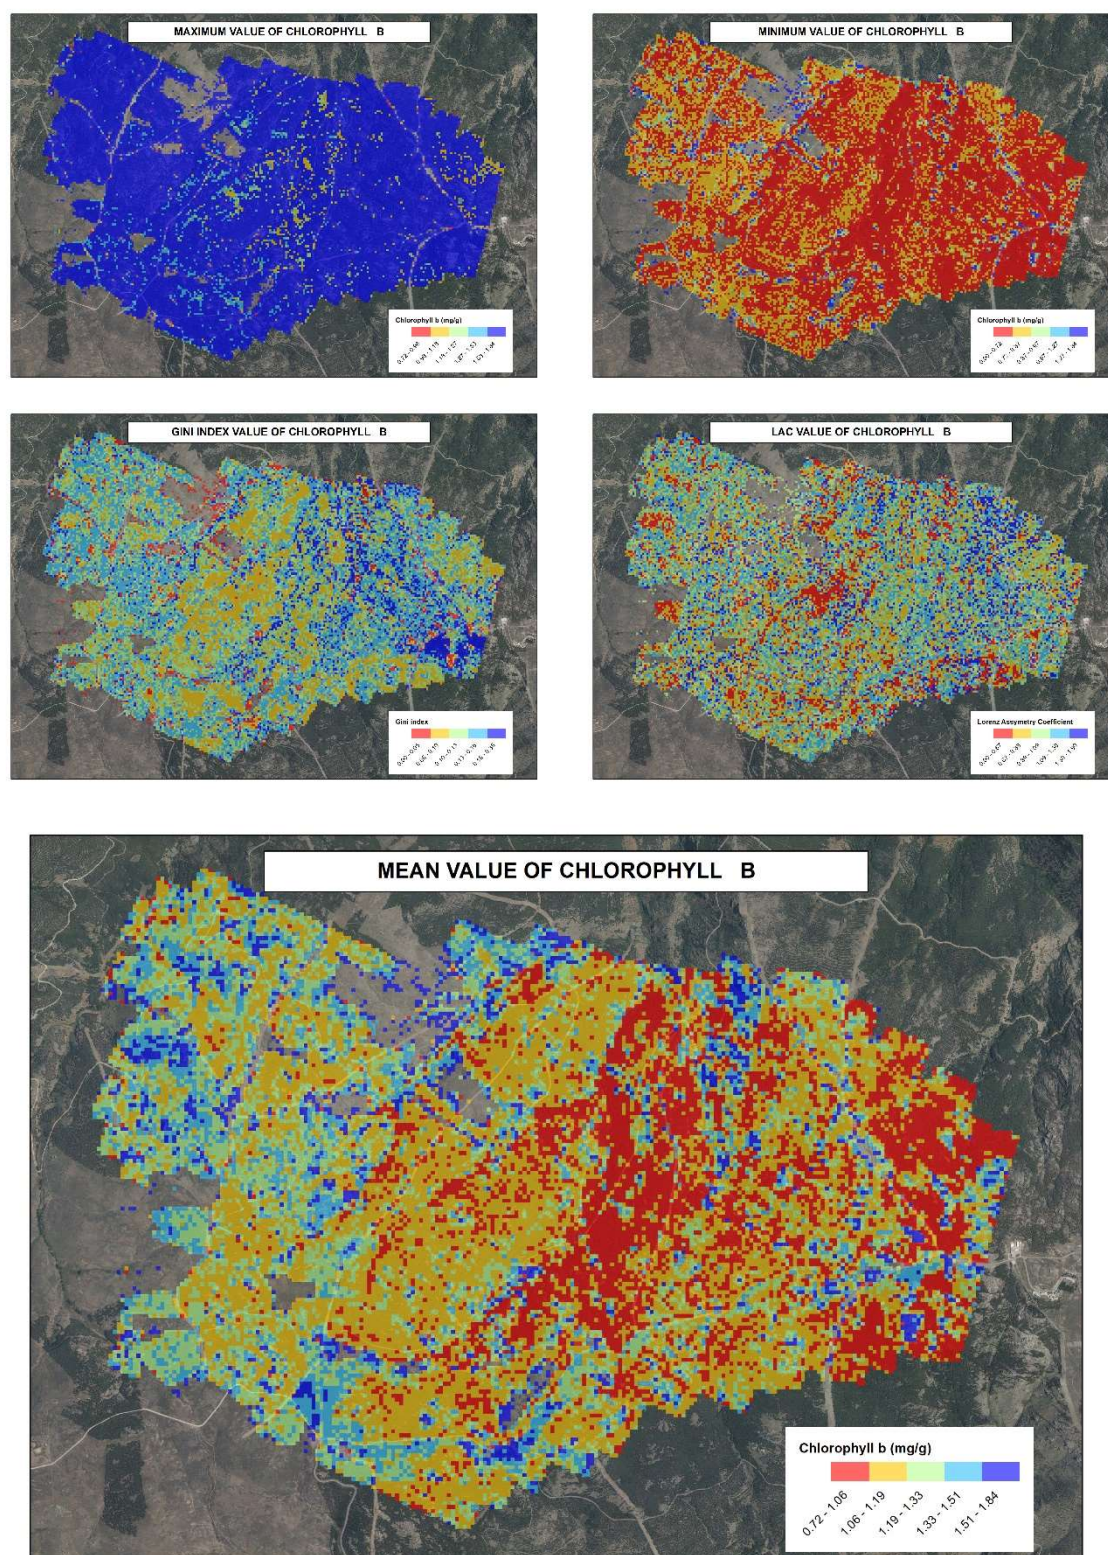

**Figure S5:** Summarizing raster layers for Chlorophyll b concentration in every individual tree.



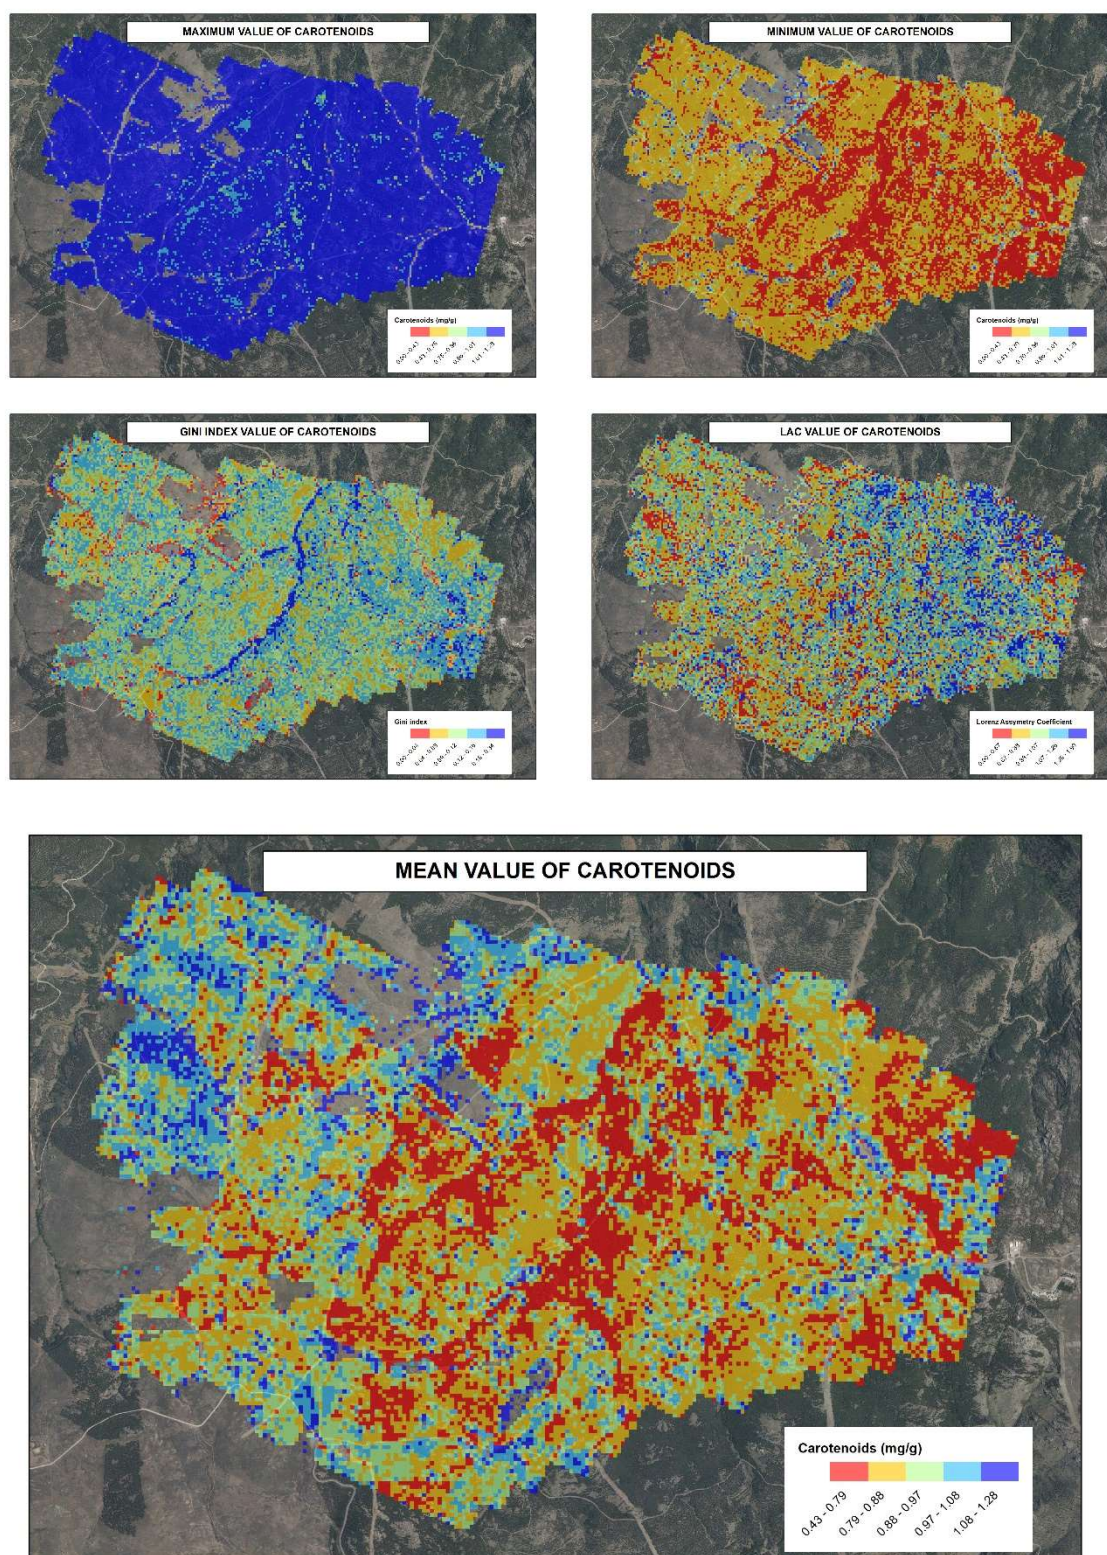

**Figure S6:** Summarizing raster layers for Carotenoids concentration in every individual tree.



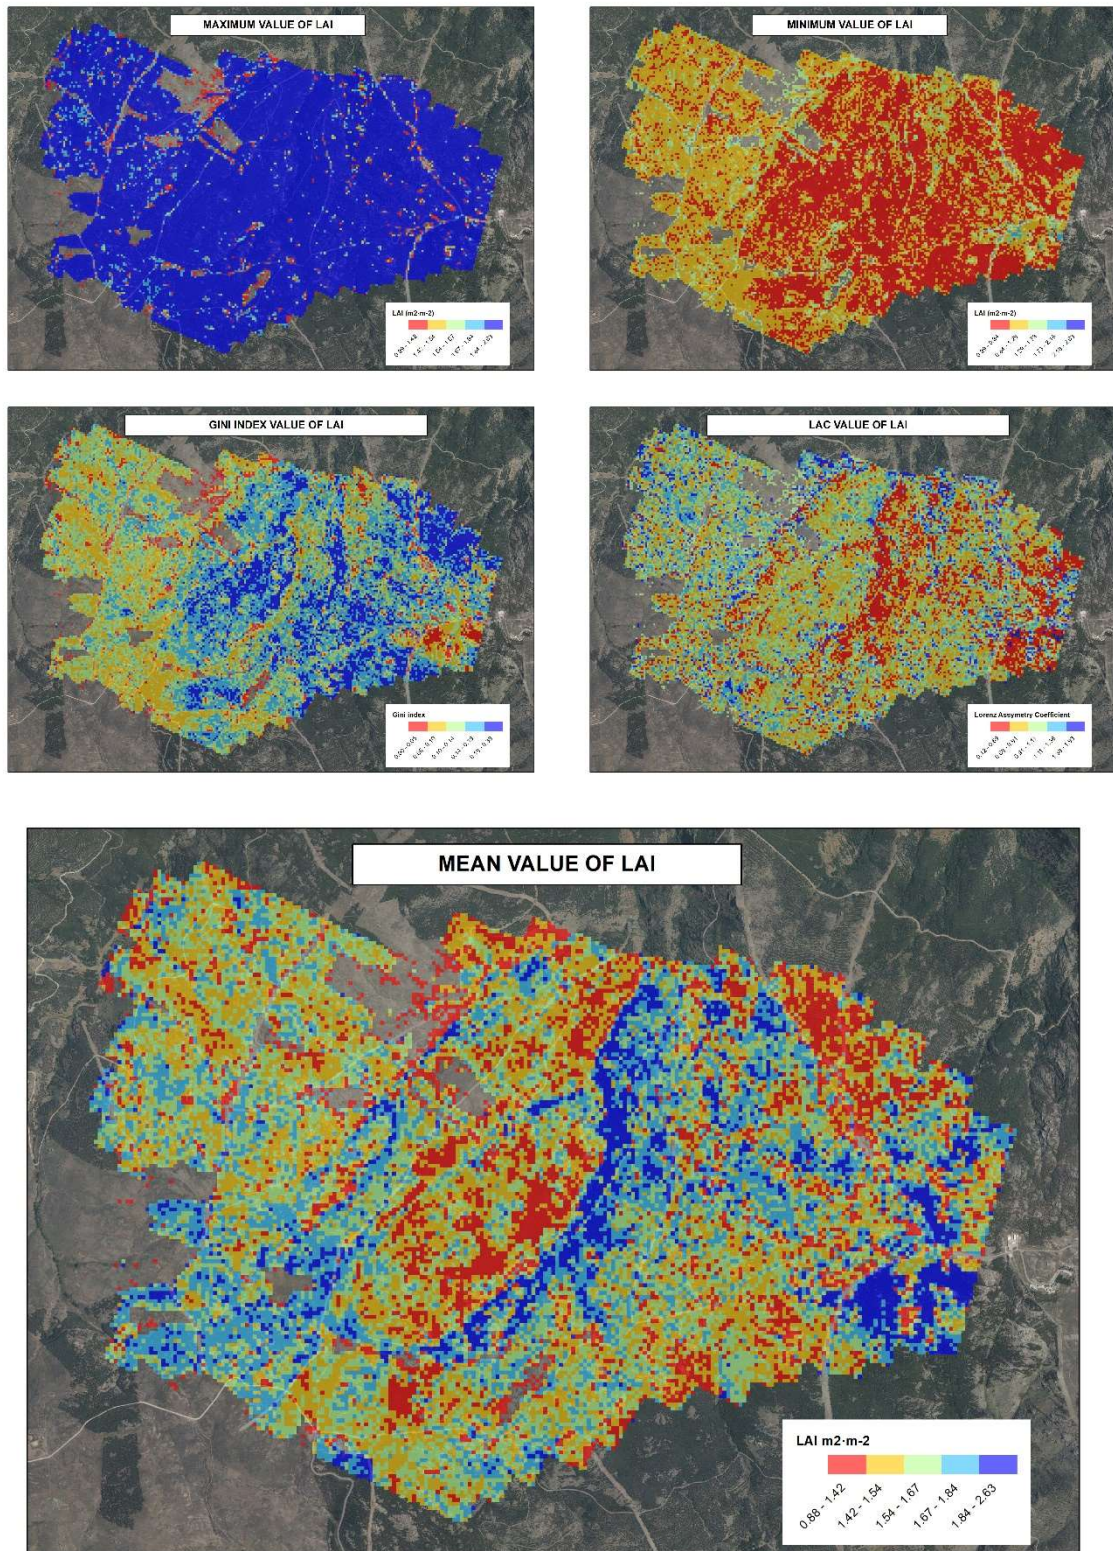

**Figure S7:** Summarizing raster layers for LAI in every individual tree.



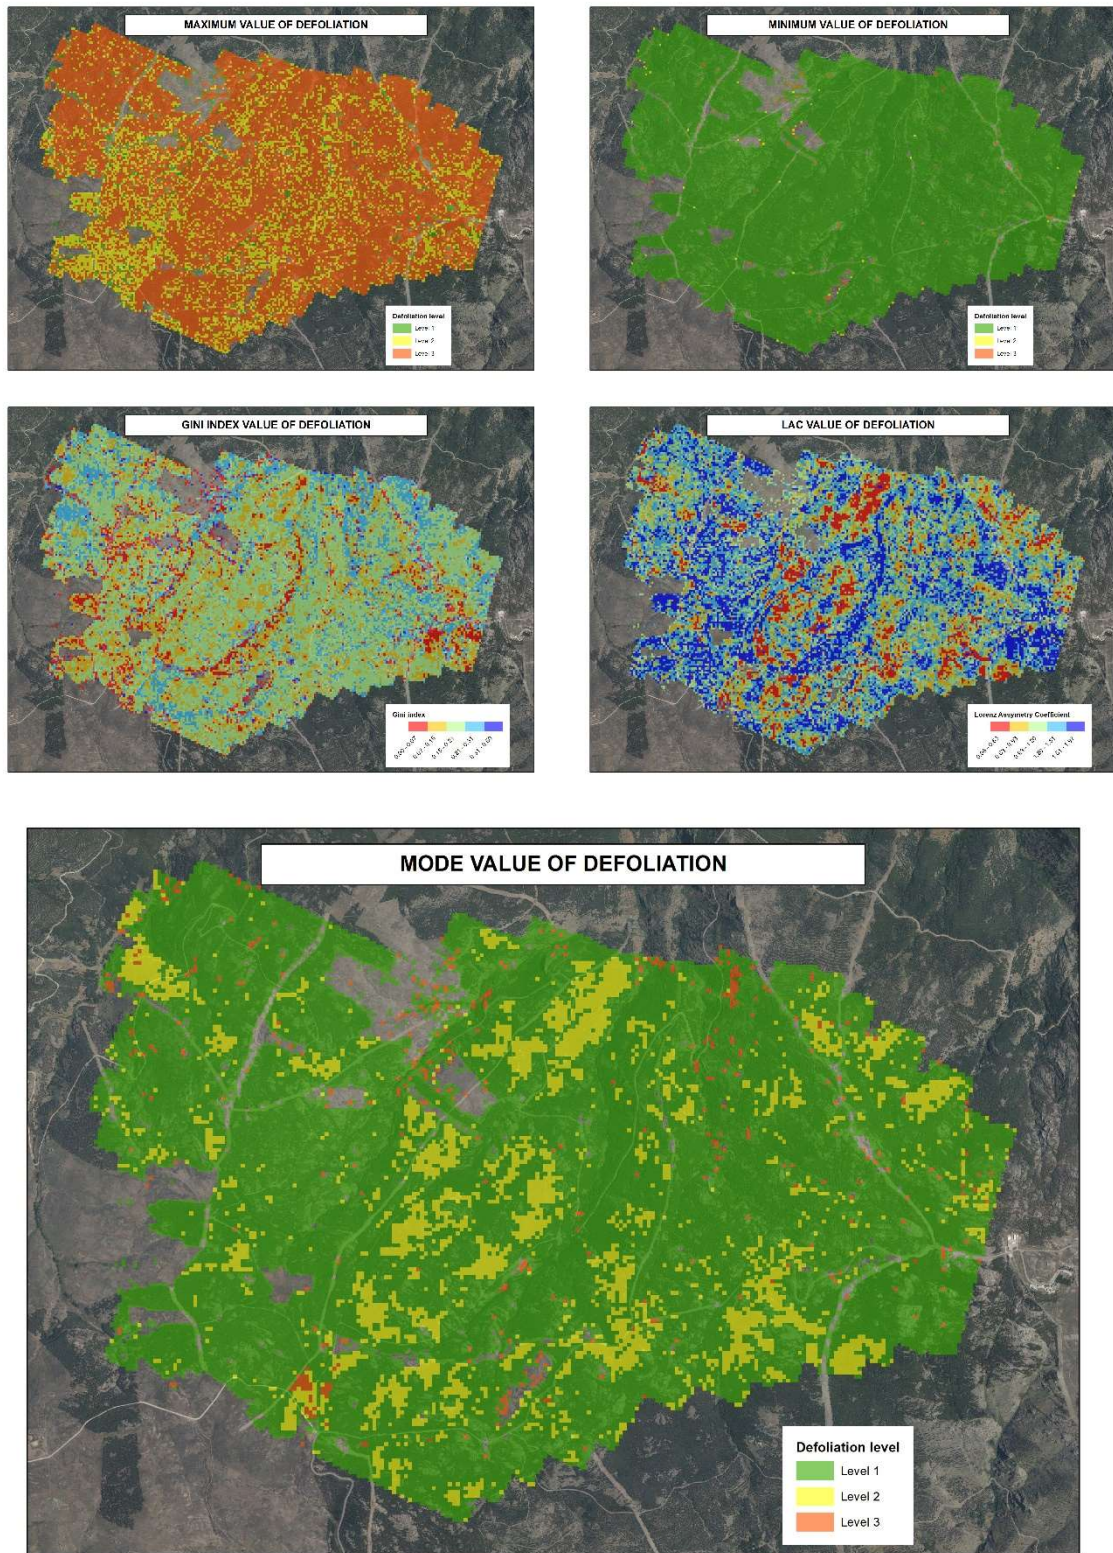

**Figure S8:** Summarizing raster layers for defoliation levels in every individual tree.



**Table S1.** Technical specifications of the ALS data.

| Characteristic                             | Value                      |
|--------------------------------------------|----------------------------|
| Laser scanning system                      | Leica ALS60                |
| Wavelength                                 | 1064 nm                    |
| Average flying altitude above ground level | 11000 fts                  |
| Field of View                              | 12°                        |
| Average point density                      | 9.88 points/m <sup>2</sup> |
| Across Track Accuracy                      | 0.14 m                     |
| Along Track Accuracy                       | 0.14 m                     |
| Accuracy of the point cloud (RMSEz)        | ≤0.07 m                    |



**Table S2.** Selected LiDAR and WorldView2 metrics parameters to run statistical analyses and modelling of Chlorophyll a, Chlorophyll b, Carotenoids, LAI and defoliation.

| Abbreviation         | Metric                                                                                     |
|----------------------|--------------------------------------------------------------------------------------------|
| B1_mean              | Mean value of pixels included in tree crown for band 1 in WorldView-2                      |
| B1_min               | Minimum value of pixels included in tree crown for band 1 in WorldView-2                   |
| B1_max               | Maximum value of pixels included in tree crown for band 1 in WorldView-2                   |
| B2_mean              | Mean value of pixels included in tree crown for band 2 in WorldView-2                      |
| B2_min               | Minimum value of pixels included in tree crown for band 2 in WorldView-2                   |
| B2_max               | Maximum value of pixels included in tree crown for band 2 in WorldView-2                   |
| B3_mean              | Mean value of pixels included in tree crown for band 3 in WorldView-2                      |
| B3_min               | Minimum value of pixels included in tree crown for band 3 in WorldView-2                   |
| B3_max               | Maximum value of pixels included in tree crown for band 3 in WorldView-2                   |
| B4_mean              | Mean value of pixels included in tree crown for band 4 in WorldView-2                      |
| B4_min               | Minimum value of pixels included in tree crown for band 4 in WorldView-2                   |
| B4_max               | Maximum value of pixels included in tree crown for band 4 in WorldView-2                   |
| B5_mean              | Mean value of pixels included in tree crown for band 5 in WorldView-2                      |
| B5_min               | Minimum value of pixels included in tree crown for band 5 in WorldView-2                   |
| B5_max               | Maximum value of pixels included in tree crown for band 5 in WorldView-2                   |
| B6_mean              | Mean value of pixels included in segmented tree crown for band 6 in                        |
| B6_min               | Minimum value of pixels included in segmented tree crown for band 6 in                     |
| B6_max               | Maximum value of pixels included in segmented tree crown for band 6 in                     |
| B7_mean              | Mean value of pixels included in segmented tree crown for band 7 in                        |
| B7_min               | Minimum value of pixels included in segmented tree crown for band 7 in                     |
| B7_max               | Maximum value of pixels included in segmented tree crown for band 7 in                     |
| B8_mean              | Mean value of pixels included in segmented tree crown for band 8 in                        |
| B8_min               | Minimum value of pixels included in segmented tree crown for band 8 in                     |
| B8_max               | Maximum value of pixels included in segmented tree crown for band 8 in                     |
| GNDVI                | Mean GNDVI value of pixels included in segmented tree crown                                |
| RENDVI               | Mean RENDVI value of pixels included in segmented tree crown                               |
| NDVI                 | Mean NDVI value of pixels included in segmented tree crown                                 |
| CRI                  | Mean CRI value of pixels included in segmented tree crown                                  |
| PRI                  | Mean PRI value of pixels included in segmented tree crown                                  |
| CSI                  | Mean CSI value of pixels included in segmented tree crown                                  |
| PSRI                 | Mean PSRI value of pixels included in segmented tree crown                                 |
| REY                  | Mean REY value of pixels included in segmented tree crown                                  |
| zperc <sub>i</sub>   | $i^{\text{th}}$ percentile (10-90) of all the return heights of the segmented tree crown   |
| zmax                 | Maximum elevation from all returns of the segmented tree crown                             |
| zmean                | Mean elevation from all returns of the segmented tree crown                                |
| zskew                | Skewness of the elevation from all returns of the segmented tree crown                     |
| zkurt                | Kurtosis of the elevation from all returns of the segmented tree crown                     |
| Half_height          | Half the height of the tree                                                                |
| zperc <sub>i</sub> m | $i^{\text{th}}$ percentile (10-90) of the return heights from the upper half of the height |
| binc <sub>i</sub>    | $i^{\text{th}}$ percentile (10-90) of all the return heights of the segmented tree crown   |
| binc <sub>i</sub> m  | $i^{\text{th}}$ percentile (10-90) bincentile of the return heights from the upper half of |
| porc1r               | Percentage of first returns of the segmented tree crown                                    |
| porc1rabove          | Percentage of first returns above 2 meters of the segmented tree crown                     |



| Abbreviation          | Metric                                                                                             |
|-----------------------|----------------------------------------------------------------------------------------------------|
| porclast              | Percentage of last returns of the segmented tree crown                                             |
| porcunic              | Percentage of unique returns of the segmented tree crown                                           |
| zmin1r                | Minimum elevation of the first returns of the segmented tree crown                                 |
| zperc <sub>i</sub> 1r | i <sup>th</sup> percentile (10-90) of the first return heights of the segmented tree crown         |
| zmax1r                | Maximum elevation of the first returns of the segmented tree crown                                 |
| zmean1r               | Mean elevation of the first returns of the segmented tree crown                                    |
| zskew1r               | Skewness of the elevation of the first returns of the segmented tree crown                         |
| zkurt1r               | Kurtosis of the elevation of the first returns of the segmented tree crown                         |
| cov                   | Percentage of 1 <sup>st</sup> returns above 2 m from among all 1 <sup>st</sup> returns of the tree |
| dns                   | Percentage of all returns above 2 m from among all returns of the tree                             |
